# Supplementary material
Source: Elsevier journal article supplement (https://www.sciencedirect.com/science/article/pii/S0212656721000299)
Supplement: mmc1 [file S0212656721000299:mmc1.doc]

**Apéndice**

**Tabla A.1. Resultados del análisis factorial**

| **Compromiso por el Interés Público** | **Carga factorial** |
| --- | --- |
| Compromiso con el Interés Público 1 | 0,77 |
| Compromiso con el Interés Público 2 | 0,75 |
| Compromiso con el Interés Público 3 | 0,60 |
| Compromiso con el Interés Público 4 | 0,50 |
| **Porcentaje de varianza explicada**  **Valor propio**  **Índice KMO**  **Test de esfericidad de Bartlett**  **Significación** | 58,00  2,30  0,74  575,48  0,00 |
| **Compasión** | **Carga factorial** |
| Compasión 1 | 0,73 |
| Compasión 2 | 0,75 |
| Compasión 3 | 0,78 |
| **Porcentaje de varianza explicada**  **Valor propio**  **Índice KMO**  **Test de esfericidad de Bartlett**  **Significación** | 71,01  2,13  0,70  554,95  0,00 |
| **Apoyo percibido por parte del Supervisor** | **Carga factorial** |
| Apoyo percibido por parte del Supervisor 1 | 0,91 |
| Apoyo percibido por parte del Supervisor 2 | 0,78 |
| Apoyo percibido por parte del Supervisor 3 | 0,88 |
| Apoyo percibido por parte del Supervisor 4 | 0,50 |
| **Porcentaje de varianza explicada**  **Valor propio**  **Índice KMO**  **Test de esfericidad de Bartlett**  **Significación** | 72,41  2,89  0,80  1509,177  0,00 |

**Tabla A.2. Estadísticas de colinealidad.**

| **Variables** | **Tolerancia** | **VIF** |
| --- | --- | --- |
| **IUC5** | 0,092 | 10,927 |
| **IUC7** | 0,021 | 47,378 |
| **IUC10** | 0,04 | 24,832 |

IUC5, IUC7, IUC10: porcentaje de población con ingresos por unidad de consumo por debajo de 5000 euros, 7000 euros, 10000 euros, respectivamente (porcentaje).
